# Supplementary material for: Whole-Genome and Transcriptional Analysis of Treatment-Emergent Small-Cell Neuroendocrine Prostate Cancer Demonstrates Intraclass Heterogeneity
Source: Oxford University Press journal article supplement (doi:10.1158/1541-7786.mcr-18-1101), 2019-03-28
Supplement: 15417786mcr181101-sup-210344_3_supp_5402011_prdprr.docx [file 15417786mcr181101-sup-210344_3_supp_5402011_prdprr.docx]

**Supplementary Table 2. Clinical Characteristics of the Evaluable Paired Biopsy Cohort**

|  | **Evaluable Pairs Cohort**  **(N = 14)** |
| --- | --- |
| **Baseline Median Age (range)** | 69 (55-88) |
| **Race/Ethnicity (%)**  White  Black  Asian  Unknown | 12 (86)  1 (8)  0  1 (8) |
| **Gleason Grade at Diagnosis (%)**  6  7  ≥ 8  Unknown | 1 (8)  1 (8)  11 (79)  1 (8) |
| **Baseline Site of Biopsy (%)**  Bone  Lymph Node  Liver  Other Soft Tissue | 5 (36)  8 (57)  0  1 (8) |
| **Same Organ Type for Progression Biopsy**  Yes  No | 11 (79)  3 (21) |
